# Supplementary material for: Ectopic expression of GmNF-YA8 in Arabidopsis delays flowering via modulating the expression of gibberellic acid biosynthesis- and flowering-related genes and promotes lateral root emergence in low phosphorus conditions
Source: Frontiers journal article supplement (doi:10.3389/fpls.2022.1033938), 2022-10-20
Supplement: Data_Sheet_3.pdf [file Data_Sheet_3.pdf]

## SUPPLEMENTARY FIGURE 2

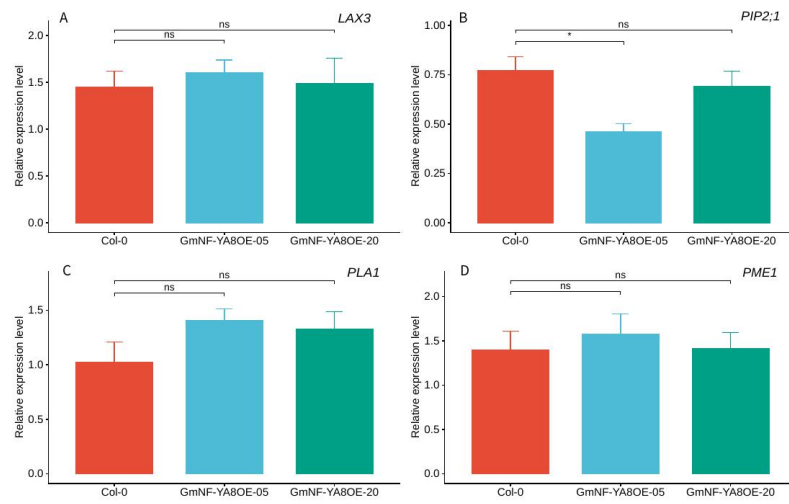

Transcript levels of *AtLAX3*, *AtPME1*, *AtPIP2*, and *AtPLA1* in rooting zone of PR
