# Supplementary material for: Ectopic expression of GmNF-YA8 in Arabidopsis delays flowering via modulating the expression of gibberellic acid biosynthesis- and flowering-related genes and promotes lateral root emergence in low phosphorus conditions
Source: Front Plant Sci. 2022 Oct 20;13:1033938. doi: 10.3389/fpls.2022.1033938 (PMC9630906; doi:10.3389/fpls.2022.1033938)
Supplement: Supplementary Sheet 1 — Fold change of GmNF-YA8 to different treatments. RNA-seq data is from public soybean RNA-seq database (http://ipf.sustech.edu.cn/pub/soybean/), which includes 4,085 Glycine max RNA-Seq libraries. [file DataSheet_1.xlsx]

## Sheet: GLYMA09G023800_treatment_upregu
project	groupName	mock_FPKMmean	treatment_FPKMmean	mock_STD	treatment_STD	logFoldChange
PRJNA489734	low phosphate_PRJNA489734.2.1	21.003	116.45	2.72055	18.7796	2.56096
PRJNA479468	Pi25 mM_PRJNA479468.2.1	16.1648	36.7011	1.71676	7.30995	1.2394
PRJNA219510	LD3weeks to SD5days_PRJNA219510.2.31	13.1038	28.8383	1.6686	7.11584	1.12042
PRJNA369414	2/4-D 24h*_PRJNA369414.2.1	2.28919	16.731	0.641053	2.62731	2.51412
PRJNA560864	Bradyrhizobium diazoefficiens USDA110_PRJNA560864.2.3	10.8485	24.4774	0.740208	4.1024	1.06888
PRJNA219510	LD3weeks to SD5days_PRJNA219510.2.19	13.7695	26.565	1.74935	3.67781	0.766491
PRJNA594515	infestation_PRJNA594515.2.8	11.2411	22.0797	1.94509	0.722059	0.974481
PRJNA219510	LD3weeks to SD5days_PRJNA219510.2.25	15.9361	25.6073	4.8164	5.06793	0.689129
PRJNA432861	0.9% NaCl 24h_PRJNA432861.2.8	23.7485	33.2198	3.65068	1.51589	0.400681
PRJNA219510	LD3weeks to SD5days_PRJNA219510.2.22	14.6413	23.6946	0.49777	3.3335	0.588744
PRJNA306380	severe stress_PRJNA306380.2.1	11.7047	20.3219	0.745592	3.04265	0.73589
PRJNA644602	water deficit and heat_PRJNA644602.2.3	17.2509	25.4276	1.99326	1.74868	0.62653
PRJNA306380	mild stress_PRJNA306380.2.4	9.01939	16.486	0.549982	3.46886	0.755667
PRJNA509794	heat stress_PRJNA509794.2.4	9.43086	16.4026	2.33867	0.332422	0.512949
PRJNA560864	Bradyrhizobium diazoefficiens USDA110_PRJNA560864.2.2	10.1825	16.7881	1.42151	1.70606	0.878438
PRJNA574764	14dpi P.sojae_PRJNA574764.2.6	6.69017	13.1125	0.409748	0.215459	0.823019
PRJNA374025	Bean Pod Mottle Virus GmMEKK1 silencing contruct_PRJNA374025.2.1	5.49938	11.1845	1.29797	1.26035	0.691096
PRJNA407016	8%PEG8000 6h*_PRJNA407016.2.1	9.74546	14.3198	1.48705	0.503517	0.598795
PRJNA407016	8%PEG8000 12h*_PRJNA407016.2.2	9.74546	14.197	1.48705	0.555523	0.689263
PRJNA664557	with SynCom1_PRJNA664557.2.1	12.6603	16.9696	2.89748	1.41871	0.468645
PRJNA574764	4dpi P.sojae_PRJNA574764.2.1	6.54362	10.0641	1.37621	1.25402	0.684706
PRJNA574626	2d submergence*_PRJNA574626.2.10	11.4682	14.3712	0.989593	2.70913	0.564292
PRJNA574626	1d submergence*_PRJNA574626.2.9	11.4682	14.0892	0.989593	1.09958	0.551537
PRJNA574626	3d submergence*_PRJNA574626.2.11	11.4682	12.5767	0.989593	0.541113	0.447953
Please see:
http://ipf.sustech.edu.cn/pub/soybean/

## Sheet: GLYMA09G023800_treatment_downre
project	groupName	mock_FPKMmean	treatment_FPKMmean	mock_STD	treatment_STD	logFoldChange
PRJNA386934	dehydrated_PRJNA386934.2.3	69.3826	19.2071	1.08735	1.2678	-1.8087
PRJNA386934	dehydrated_PRJNA386934.2.4	66.9436	25.8359	19.9644	1.20236	-1.16206
PRJNA386934	dehydrated_PRJNA386934.2.1	68.4503	35.4684	4.1937	3.86082	-0.829968
PRJNA386934	dehydrated_PRJNA386934.2.2	49.8398	22.2707	6.10395	1.22633	-0.947067
PRJNA514200	Aphis glycines_PRJNA514200.2.3	43.5953	17.0497	14.4586	2.7818	-1.61585
PRJNA514200	Heterodera glycines_PRJNA514200.2.2	43.5953	21.2094	14.4586	1.67706	-0.969707
PRJNA339152	Depodded_PRJNA339152.2.2	46.3821	31.13	4.80187	3.38757	-0.593875
PRJNA432861	0.9% NaCl 2h_PRJNA432861.2.2	23.169	9.96394	1.75878	1.32616	-1.11055
PRJNA324522	drought*_PRJNA324522.2.1	20.4973	9.06763	1.09412	1.62122	-0.898604
PRJNA544698	24 hours -Pi/ 48 hours +Pi_PRJNA544698.2.10	23.2503	13.0186	4.93277	1.68186	-0.592426
PRJNA219510	shortday_PRJNA219510.2.2	22.3515	12.2976	4.71482	1.0912	-0.660404
PRJNA471709	96hr susceptible_PRJNA471709.2.6	23.2864	13.9819	1.00284	1.3627	-0.381389
PRJNA564957	SMV-G7 4 hpi_PRJNA564957.2.6	18.0952	9.29206	0.215286	0.250656	-0.972454
PRJNA399013	heat 8h*_PRJNA399013.2.5	23.8888	15.1772	0.466131	3.59963	-0.678864
PRJNA432861	0.9% NaCl 4h_PRJNA432861.2.3	23.169	14.4742	1.75878	3.04132	-0.607514
PRJNA564957	SMV-G7 6 hpi_PRJNA564957.2.7	18.0952	9.4545	0.215286	0.86502	-1.02621
PRJNA219510	shortday_PRJNA219510.2.5	18.8505	10.7361	4.59232	0.639978	-0.566222
PRJNA449574	heat and drought*_PRJNA449574.2.3	24.658	16.6836	1.33034	1.43652	-0.567315
PRJNA471709	48hr susceptible_PRJNA471709.2.5	23.2864	15.4451	1.00284	1.3062	-0.434264
PRJNA432861	0.9% NaCl 1h_PRJNA432861.2.1	23.169	15.3287	1.75878	1.01277	-0.453047
PRJNA516324	Flooding 3h_PRJNA516324.2.3	19.3007	11.7313	1.58915	0.210327	-0.472548
PRJNA471709	48hr resistant_PRJNA471709.2.2	25.6576	18.2965	1.40258	1.43123	-0.379822
PRJNA564957	SMV-G7 2 hpi_PRJNA564957.2.1	17.8605	10.6447	1.20599	0.107223	-0.661508
PRJNA327272	6 hours after infestation_PRJNA327272.2.5	19.7776	12.5875	2.2033	2.95287	-0.87756
PRJNA564957	SMV-G7 4 hpi_PRJNA564957.2.2	17.8605	11.0171	1.20599	1.2394	-0.739959
PRJNA525277	5µM Pcz/1µM BL for 8h*_PRJNA525277.2.2	19.9634	13.258	2.42814	2.62861	-0.641332
PRJNA525277	5µM Pcz/1µM BL for 1h*_PRJNA525277.2.1	19.9634	13.2665	2.42814	0.737183	-0.536195
PRJNA369113	constant light conditions*_PRJNA369113.2.2	22.7031	16.1939	1.73632	3.16551	-0.479184
PRJNA327272	48 hours after infestation_PRJNA327272.2.1	19.7776	13.3879	2.2033	2.79911	-0.709276
PRJNA399013	drought and heat 8h*_PRJNA399013.2.3	23.8888	17.5741	0.466131	1.62035	-0.4201
PRJNA564957	SMV-G7 8 hpi_PRJNA564957.2.8	18.0952	11.9399	0.215286	2.25757	-0.686581
PRJNA564957	SMV-G7 8 hpi_PRJNA564957.2.4	17.8605	12.2581	1.20599	0.283698	-0.648613
PRJNA564957	SMV-G7 6 hpi_PRJNA564957.2.3	17.8605	12.3657	1.20599	0.988974	-0.592003
PRJNA266538	25 ul/l ethylene 24h_PRJNA266538.2.2	8.43732	3.49249	2.7238	0.760992	-1.39171
PRJNA327272	12 hours after infestation_PRJNA327272.2.6	19.7776	15.4762	2.2033	0.850879	-0.562952
PRJNA574626	2d submergence*_PRJNA574626.2.7	15.4488	11.539	2.56354	2.55215	-0.495983
PRJNA326110	24 hours after imbibition_PRJNA326110.2.4	12.3894	9.17387	0.898171	1.81369	-0.578292
PRJNA326110	6 hours after imbibition_PRJNA326110.2.2	12.3894	9.27706	0.898171	0.186585	-0.596169
